# Supplementary material for: Second-phase-induced fluorescence quenching in non-equivalent substituted red phosphors
Source: Royal Society of Chemistry journal article supplement (doi:10.1039/d2ra05647j), 2022-01-01
Supplement: d2ra05647j1.pdf [file d2ra05647j1.pdf]

## Supplementary Information

### Second-phase Induced Fluorescence Quenching in Non-equivalent Substituted Red Phosphors

Jun Chen,<sup>a</sup> Xianfeng Yang,<sup>c</sup> Chunyan Jiang,<sup>a</sup> Yunfeng Wang,<sup>\*ab</sup> Lei Zhou<sup>\*a</sup> and  
Mingmei Wu<sup>\*a</sup>

<sup>a</sup> School of Chemistry/School of Marine Science/School of Chemical Engineering and  
Technology, Sun Yat-Sen University, Guangzhou 510275/Zhuhai 519082, P. R. China

<sup>b</sup> School of Information Engineering, Nanyang Institute of Technology, Nanyang  
473004, P. R. China

<sup>c</sup> Analytical and Testing Center, South China University of Technology, Guangzhou,  
510640, P. R. China

\* Corresponding authors. Email addresses: [ceswmm@mail.sysu.edu.cn](mailto:ceswmm@mail.sysu.edu.cn) (M. M. Wu);  
[zhoul8@mail.sysu.edu.cn](mailto:zhoul8@mail.sysu.edu.cn) (L. Zhou); [wangyunfeng@nyist.edu.cn](mailto:wangyunfeng@nyist.edu.cn) (Yunfeng Wang)

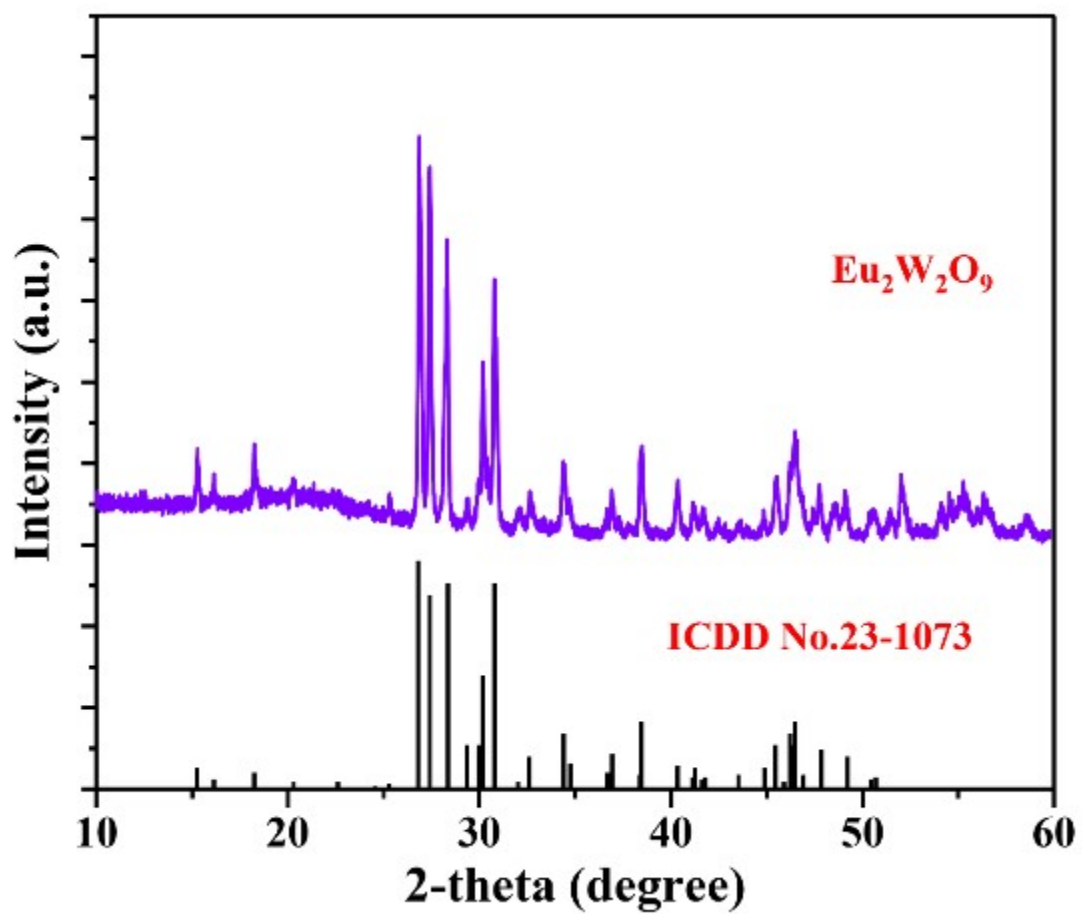

Fig. S1 XRD pattern and standard card of the as-prepared  $\text{Eu}_2\text{W}_2\text{O}_9$ .

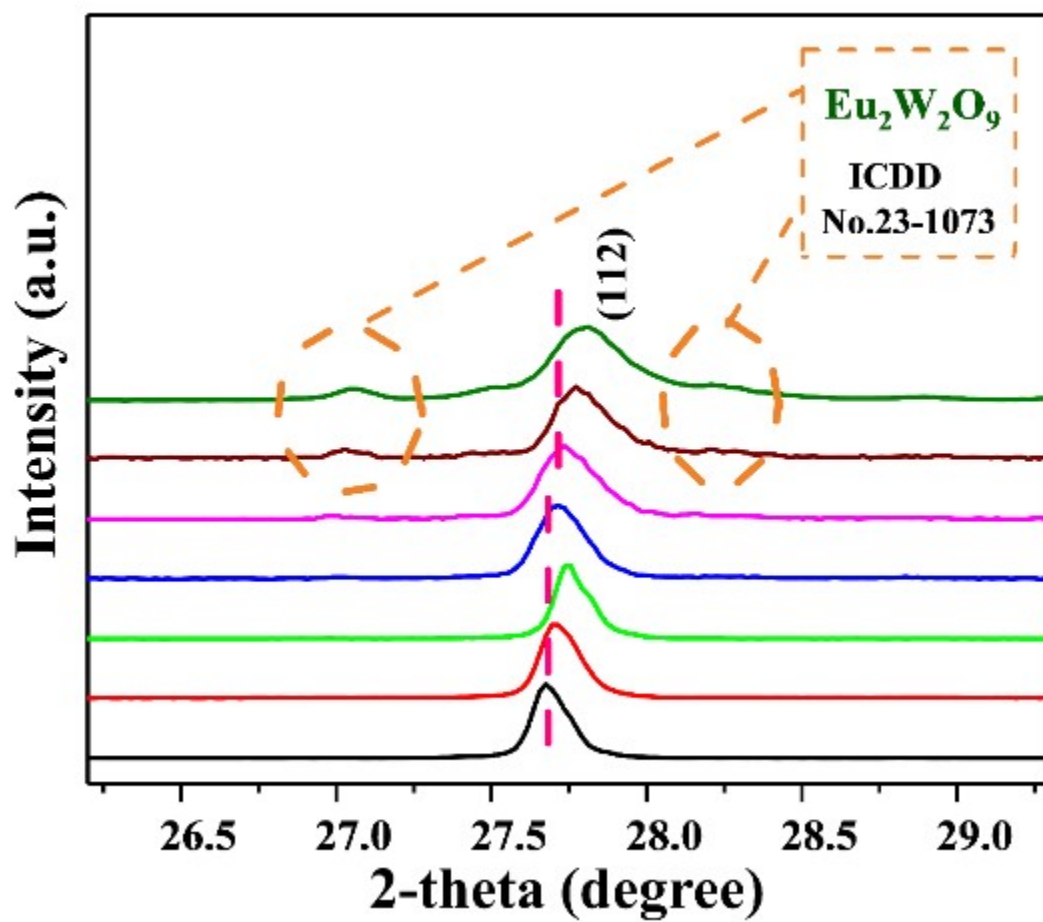

Fig. S2 Magnified XRD patterns with the range of 26.2-29.3°.

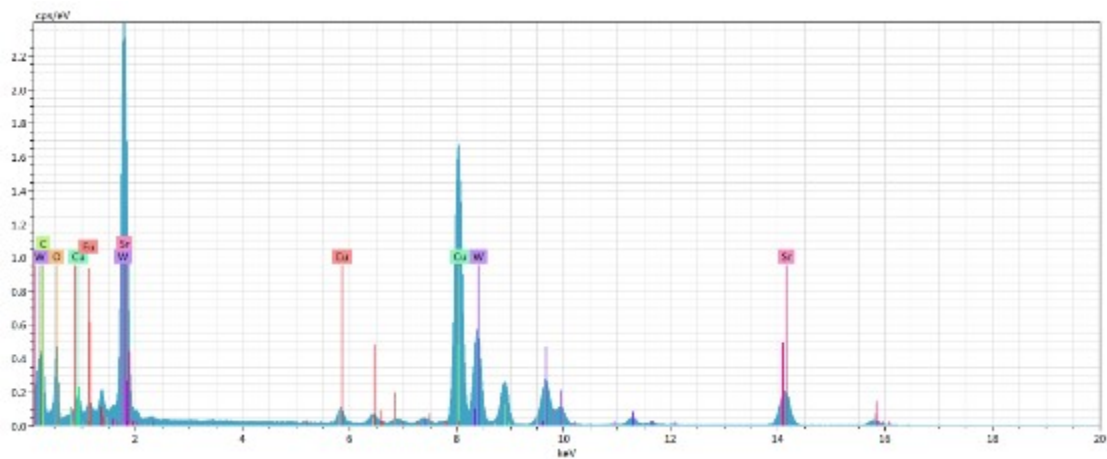

**Fig. S3** EDX spectrum of  $\text{SrWO}_4:20\%\text{Eu}^{3+}$ , the scanning point shows matching elements including Sr, W, Eu, and O.

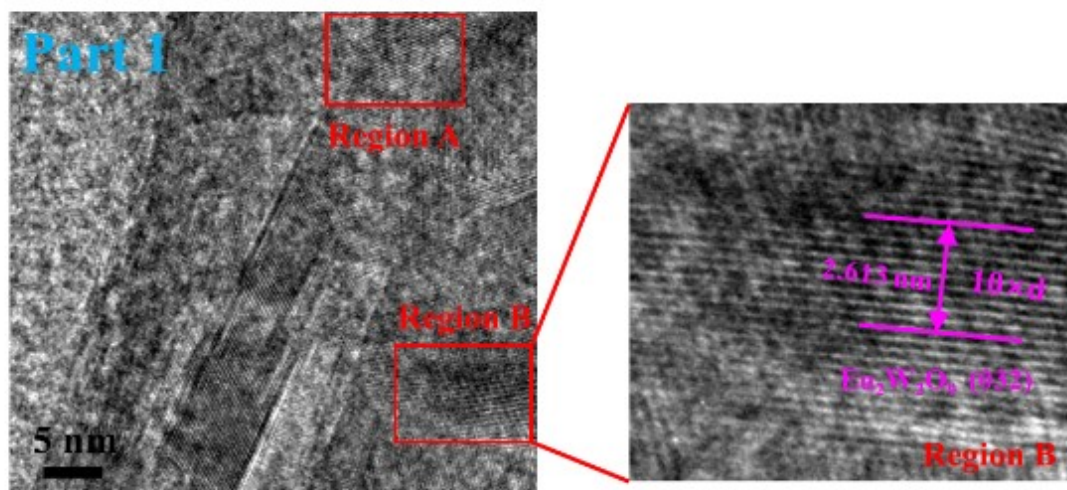

**Fig. S4** HR-TEM image of region A and B in part 1, demonstrating the monoclinic crystalline  $\text{Eu}_2\text{W}_2\text{O}_9$  possessing lattice fringes of 0.2613 nm, which corresponds to the (032) crystallographic planes.

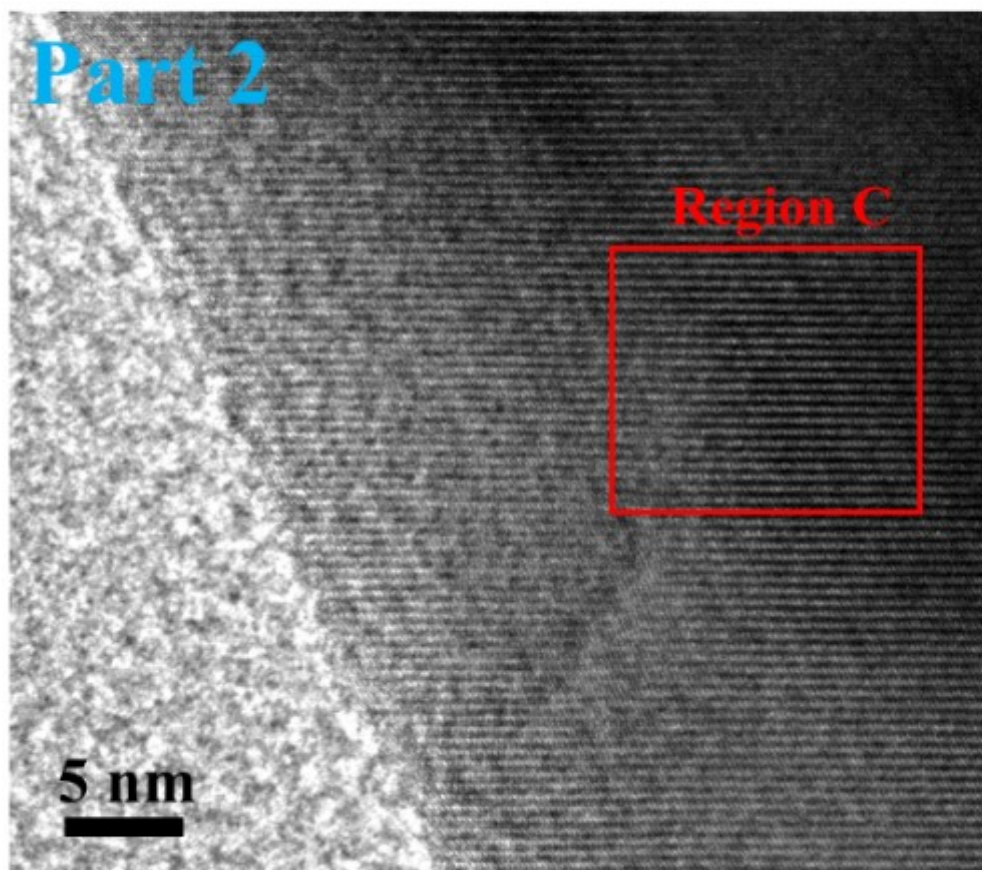

**Fig. S5** The TEM image of region C in part 2, demonstrating the typically tetragonal crystalline  $\text{SrWO}_4$  host lattice with the fringe of 0.4958nm, which corresponds to the crystallographic plane of (101).

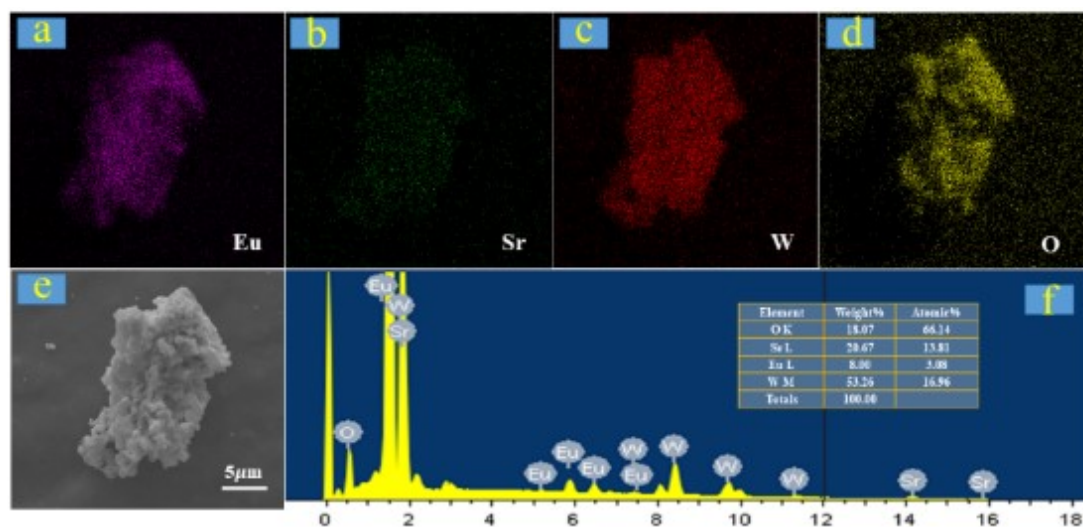

**Fig. S6** (a)-(c) Elemental mapping, (e) SEM image, and (f) EDS of the  $\text{SrWO}_4:20\%\text{Eu}^{3+}$  phosphor, the measurement results indicate the consistent atomic ratios of elementary composition in the as-prepared sample.

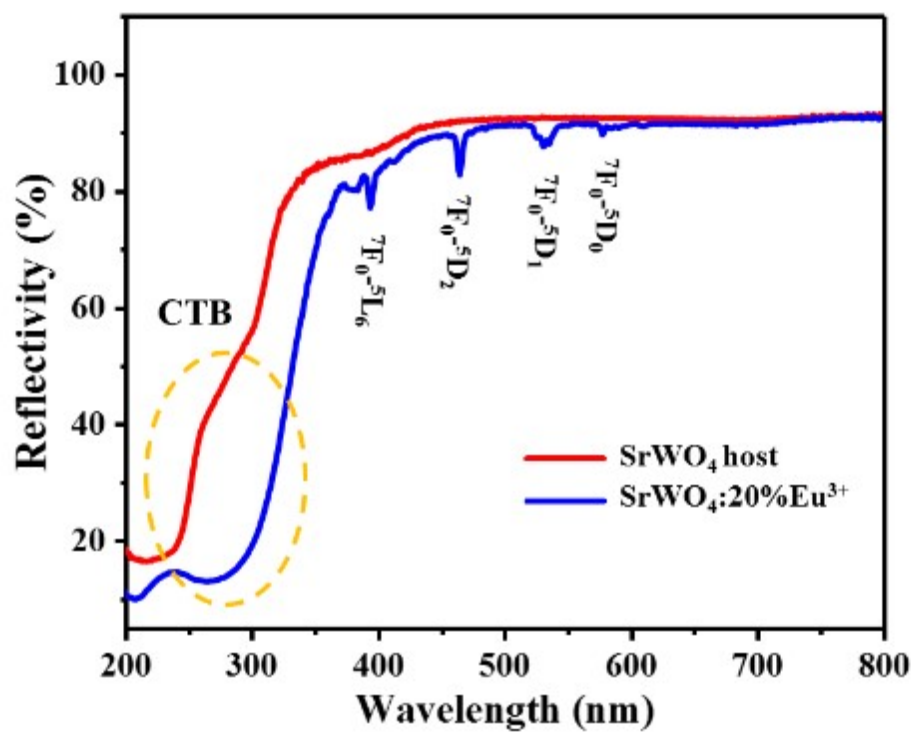

Fig. S7 The diffuse reflection spectra of un-doped and 20%Eu<sup>3+</sup>-doped SrWO<sub>4</sub> sample.



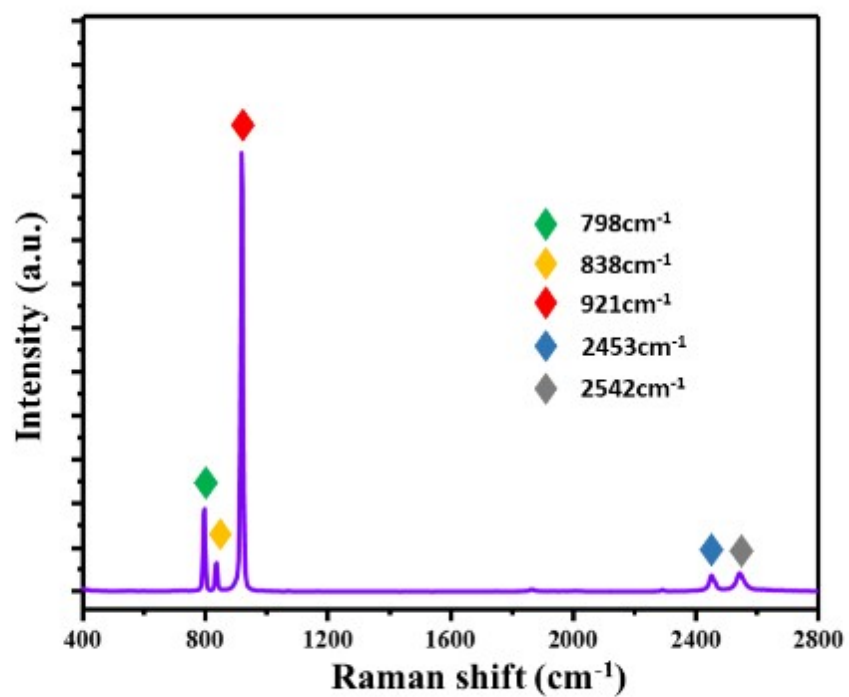

**Fig. S8** Raman spectrum of the as-prepared SrWO<sub>4</sub>:20%Eu<sup>3+</sup> phosphor, which demonstrates the host lattice with the largest phonon threshold of 921 cm<sup>-1</sup>.

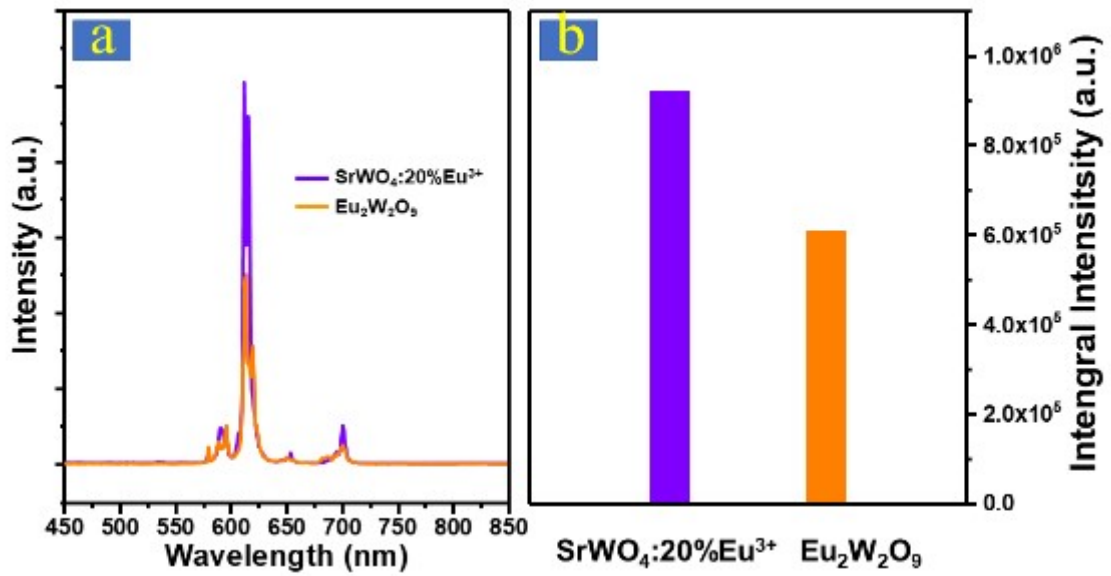

**Fig. S9** the emission lines and histogram of integral intensity on as-prepared SrWO<sub>4</sub>:20%Eu<sup>3+</sup> and Eu<sub>2</sub>W<sub>2</sub>O<sub>9</sub> samples under 394 nm excitation.

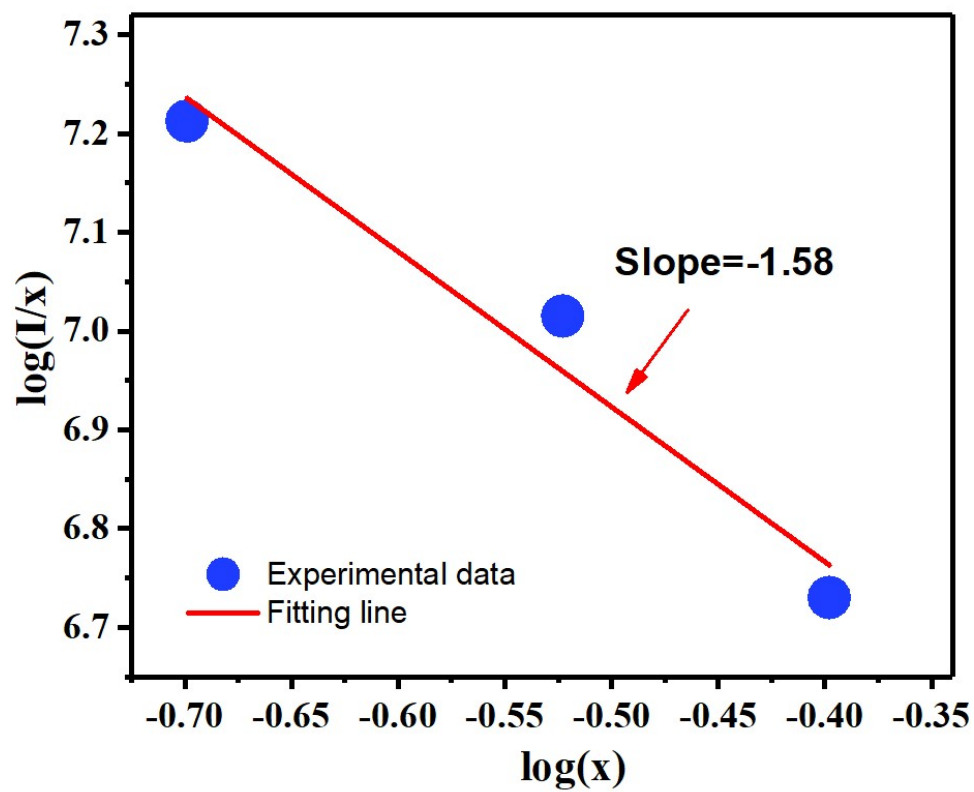

**Fig. S10** plot of  $\log(I/x)$  vs.  $\log(x)$  for the as-prepared  $\text{SrWO}_4:x\text{Eu}^{3+}$  phosphor,  $x = 20\%$ ,  $30\%$ , and  $40\%$ .

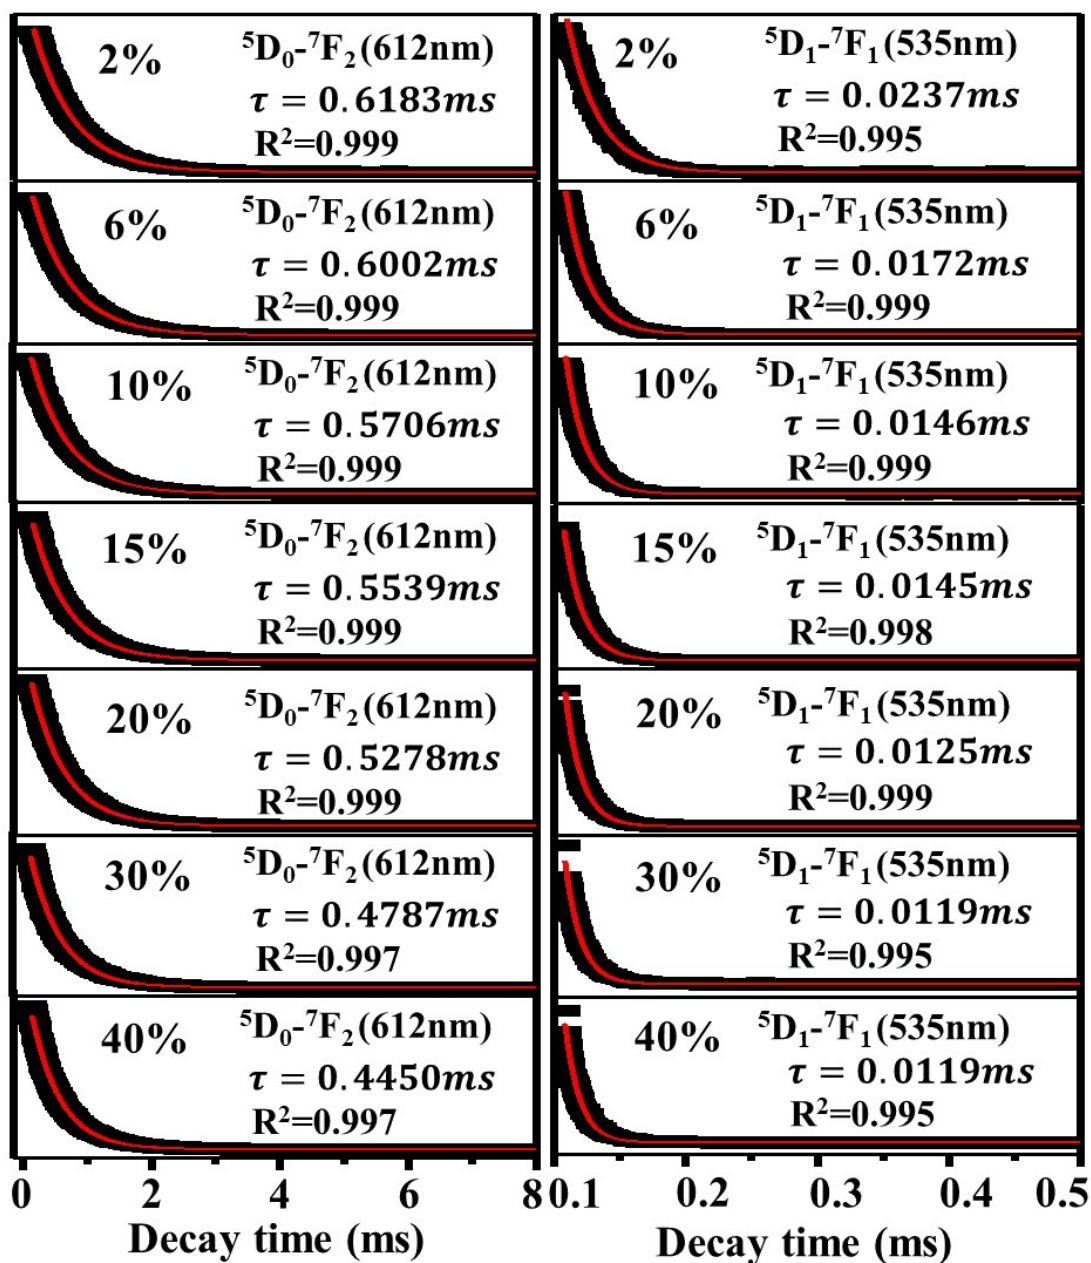

**Fig. S11** The decay curves with first order exponential fitting of <sup>5</sup>D<sub>0</sub>→<sup>7</sup>F<sub>2</sub> transition ( $\lambda_{em} = 612$  nm) and <sup>5</sup>D<sub>1</sub>→<sup>7</sup>F<sub>1</sub> transition ( $\lambda_{em} = 535$  nm) in SrWO<sub>4</sub>: xEu<sup>3+</sup> phosphors under 394 nm excitation.

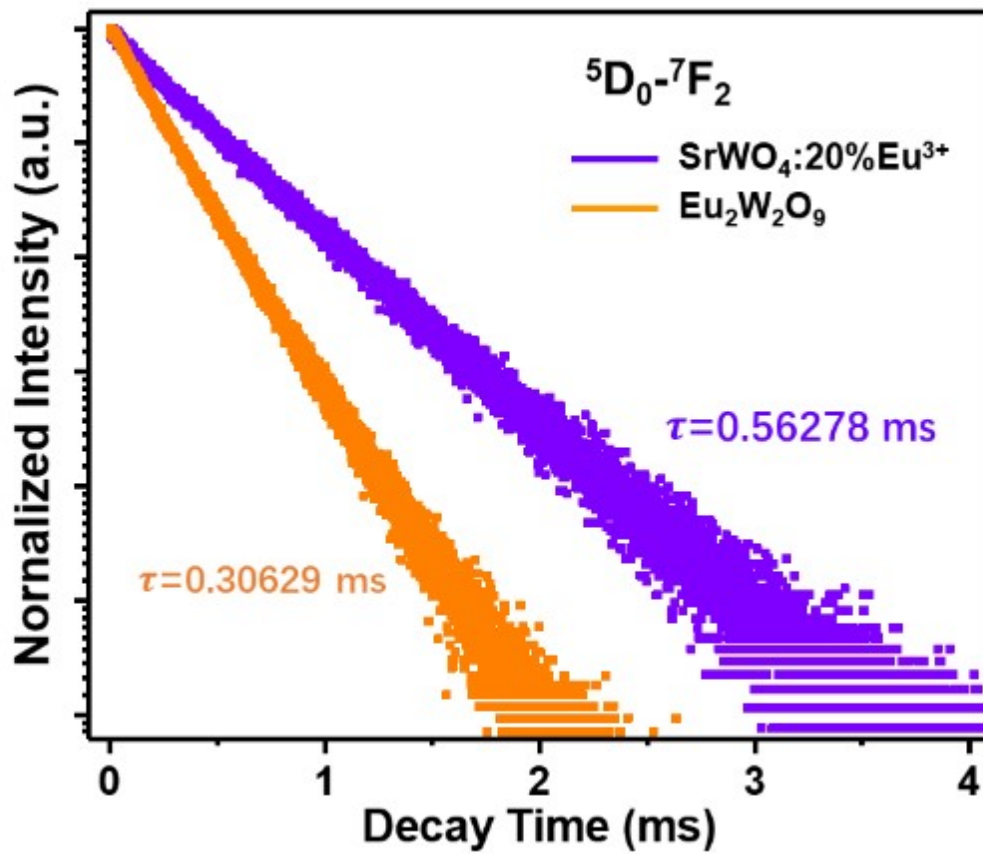

**Fig. S12** The decay curves of  ${}^5D_0 \rightarrow {}^7F_2$  transition ( $\lambda_{\text{em}} = 612 \text{ nm}$ ) in  $\text{SrWO}_4:20\%\text{Eu}^{3+}$  and  $\text{Eu}_2\text{W}_2\text{O}_9$  phosphors under 394 nm excitation.

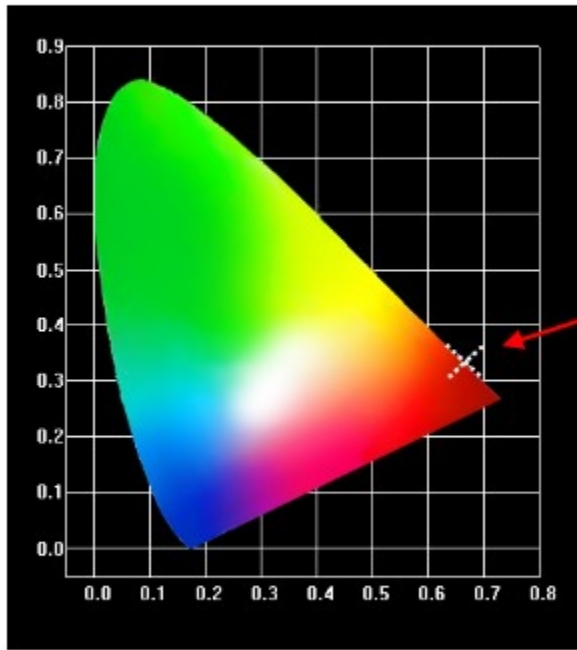

| Temp | x     | y     |
|------|-------|-------|
| 300K | 0.664 | 0.335 |
| 325K | 0.664 | 0.335 |
| 350K | 0.664 | 0.336 |
| 375K | 0.662 | 0.337 |
| 400K | 0.662 | 0.337 |
| 425K | 0.661 | 0.339 |
| 450K | 0.659 | 0.340 |
| 475K | 0.658 | 0.341 |
| 500K | 0.655 | 0.344 |

**Fig. S13** The CIE chromaticity coordinates of SrWO<sub>4</sub>: 20%Eu<sup>3+</sup> with the varying temperature range of 300-500 K, which displaying stable emitting colour in high temperature.

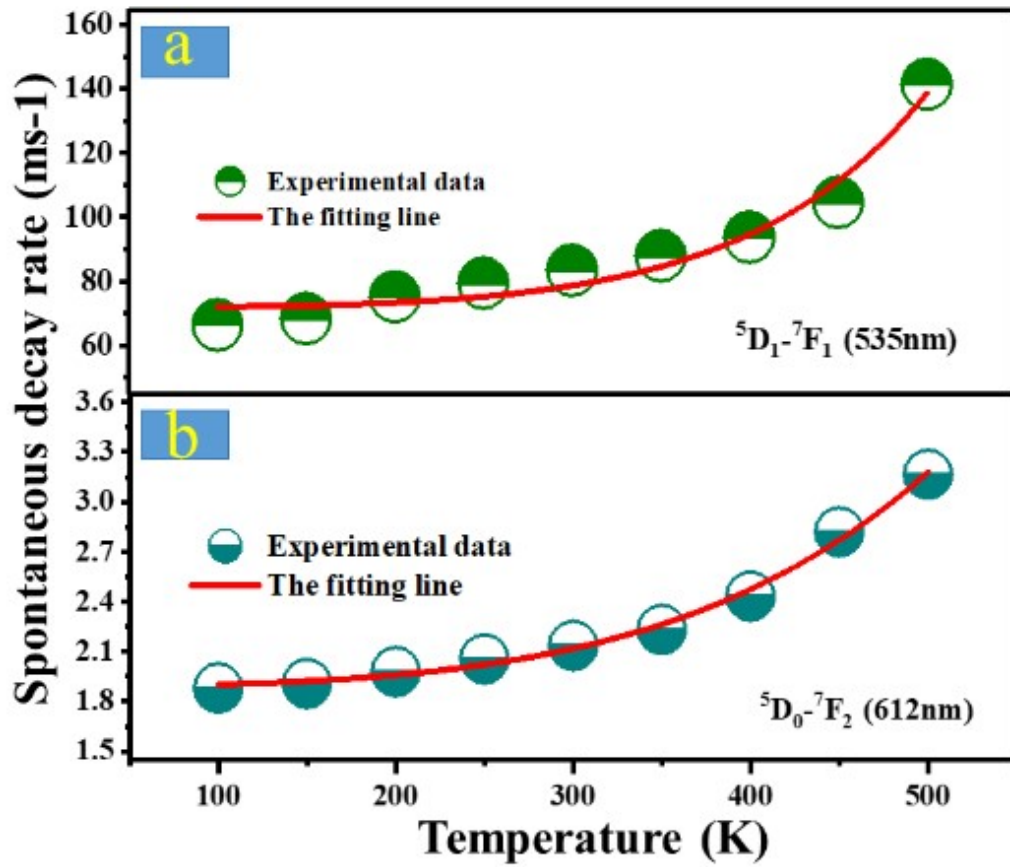

Fig. S14 Temperature-dependent spontaneous decay rate of (a)  ${}^5D_1 \rightarrow {}^7F_1$  transition ( $\lambda_{em}=535$  nm) and (c)  ${}^5D_0 \rightarrow {}^7F_2$  transition ( $\lambda_{em}=612$  nm) in SrWO<sub>4</sub>: 20%Eu<sup>3+</sup> sample.

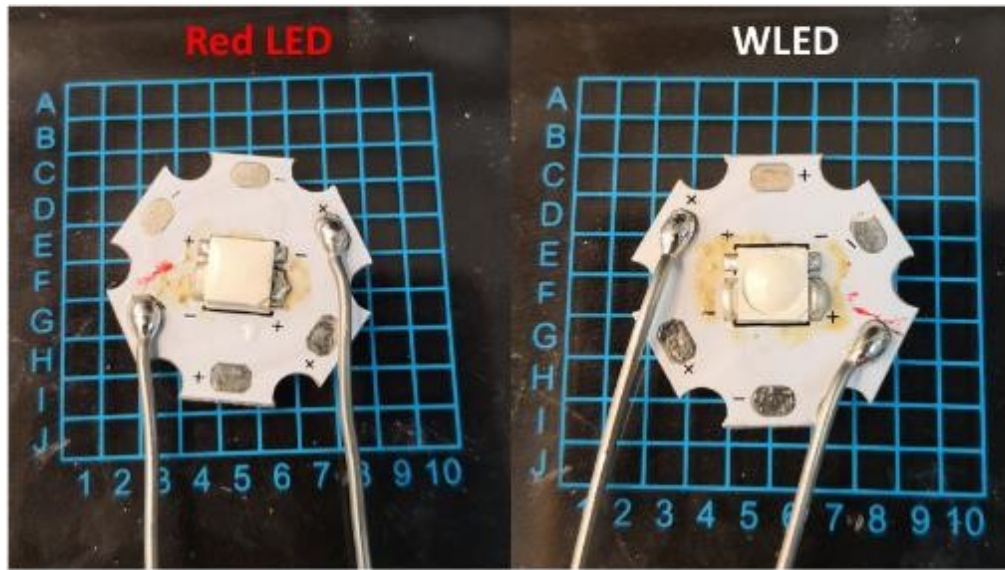

**Fig. S15** The as-encapsulated red LED and WLED device by assembling  $\text{SrWO}_4:20\%\text{Eu}^{3+}$  YGAB:  $\text{Tb}^{3+}$ , BAM:  $\text{Eu}^{2+}$  phosphors and near-UV 377nm LED chip.



### Traditional concentration quenching mechanism

The concentration quenching mechanism can be calculated by the decrease with the increasing rare-earth doping concentration. The relation between the emission intensity and  $\text{Eu}^{3+}$  doping concentration is analyzed by the following expression:<sup>1</sup>

$$\log\left(\frac{I}{x}\right) = -\frac{S}{d}\log(x) + \log(f)$$

where  $I$  represents the emission intensity,  $x$  represents the  $\text{Eu}^{3+}$  concentration.  $S=6$  is associated with dipole-dipole interaction,  $S=8$  is associated with dipole-quadrupole interaction,  $S=10$  is associated with quadrupole-quadrupole interaction.  $d$  represents the dimension of compounds, the  $d$  value is 3 in general due to the energy transfer of  $\text{Eu}^{3+}$  in the large-scale micrometer material.  $f$  is a constant which is independent of doping concentration. By rough calculation in Fig. S2, the slope of the fitting line is around -1.58,  $S$  is determined to be 4.74 approximating to 6. It illustrates the dipole-dipole interaction dominates in the concentration quenching mechanism of  $\text{SrWO}_4:\text{xEu}^{3+}$  phosphors.

### The colour purity

The colour purity of all  $\text{SrWO}_4:\text{xEu}^{3+}$  samples are calculated by the following equation:<sup>1</sup>

$$\text{colour purity} = \frac{\sqrt{(x - x_i)^2 - (y - y_i)^2}}{\sqrt{(x_d - x_i)^2 - (y_d - y_i)^2}} \times 100\%$$

where  $(x, y)$ ,  $(x_d, y_d)$  and  $(x_i, y_i)$  are the CIE coordinates of the as-prepared sample, dominant wavelength and white illumination, respectively.

### Thermal activation energy

To further understand the quenching behaviour of  $\text{SrWO}_4:\text{Eu}^{3+}$  phosphors, the thermal activation energy can be figure out by using the following equation to fit the data of emission intensity:<sup>1</sup>

$$I = \frac{I_0}{1 + \alpha \exp(-\Delta E/kT)}$$

where  $I_0$  represents the emission intensity constant,  $\alpha$  represents a rate constant on thermally activated escape,  $\Delta E$  represents the required thermal activation energy on generating temperature quenching,  $k$  represents the Boltzmann constant, and  $T$  represents the thermodynamic temperature, respectively. From the fitting result in top right corner of Fig. 10, thermal activation energy of SrWO<sub>4</sub>:20%Eu<sup>3+</sup> is 0.27 eV, which is higher than the previous reports, for example, NaBiF<sub>4</sub>:Eu<sup>3+</sup> (0.24 eV), Li<sub>3</sub>Gd<sub>3</sub>Te<sub>2</sub>O<sub>12</sub>:Eu<sup>3+</sup> (0.22 eV), K<sub>2</sub>Gd(PO<sub>4</sub>)(WO<sub>4</sub>):Eu<sup>3+</sup> (0.19 eV) and Ba<sub>6</sub>Gd<sub>2</sub>Ti<sub>4</sub>O<sub>17</sub>:Eu<sup>3+</sup>(0.144 eV).<sup>2-5</sup>

### The spontaneous decay rates

Based on the multi-phonon relaxation theory, the total spontaneous decay rates (SDRs) of <sup>5</sup>D<sub>1</sub> and <sup>5</sup>D<sub>0</sub> can be written as follows:<sup>6</sup>

$$W_{Total} = W_R + W_{NR}(0)(1 - \exp(-\hbar\omega/kT))^{-\Delta E/\hbar\omega}$$

where  $W_{Total}$  is the total SDR,  $W_R$  is the radiative transition rate,  $W_{NR}(0)$  is the non-radiative transition rate at 0K,  $\hbar\omega$  is the average phonon energy of host material, and  $\Delta E$  is the energy gap dependence of the transfer probability. By fitting, it is calculated that  $W_R = 68.94 \text{ ms}^{-1}$  and  $W_{NR}(0) = 3.07 \text{ ms}^{-1}$  for <sup>5</sup>D<sub>1</sub>-<sup>7</sup>F<sub>1</sub>,  $W_R = 1.86 \text{ ms}^{-1}$  and  $W_{NR}(0) = 0.04 \text{ ms}^{-1}$  for <sup>5</sup>D<sub>0</sub>-<sup>7</sup>F<sub>2</sub>, the  $W_{NR}(0)$  of <sup>5</sup>D<sub>0</sub>-<sup>7</sup>F<sub>2</sub> is much smaller than that of <sup>5</sup>D<sub>1</sub>-<sup>7</sup>F<sub>1</sub>. This obvious difference originates from the small gap between <sup>5</sup>D<sub>1</sub> to <sup>5</sup>D<sub>0</sub> energy level and the serious phonon-assisted process.

### References

- 1 H. Guo, X. Huang, Y. Zeng, *J. Alloy. Compd.*, 2018, **741**, 300-306.
- 2 P. Du, X. Huang, J. S. Yu, *Chem. Eng. J.*, 2018, **337**, 91-100.
- 3 X. Huang, B. Li, H. Guo, *Ceram. Int.*, 2017, **43**, 10566-10571.

- 4 H. Deng, Z. Gao, N. Xue, J. H. Jeong, R. Yu, *J. Lumin.*, 2017, **192**, 684-689.
- 5 J. Li, Q. Liang, Y. Cao, J. Yan, J. Zhou, Y. Xu, L. Dolgov, Y. Meng, J. Shi, M. Wu, *ACS Appl. Mater. Interfaces*, 2018, **10**, 41479-41486.
- 6 Y. Wang, W. Xu, S. Cui, S. Xu, Z. Yin, H. Song, P. Zhou, X. Liu, L. Xu, H. Cui, *Nanoscale*, 2015, **7**, 1363-1373.
